# Supplementary material
Source: PubMed Central journal article supplement (PMC5503799)
Supplement: NIHMS862681-supplement-supplement_1.pdf [file NIHMS862681-supplement-supplement_1.pdf]

Table EI. Characteristics and exposures of participants, subdivided by stress category of the primary caregiver

| Characteristic                                             | Normal stress<br>(PSS ≤7,<br>N=247) | High stress<br>(PSS=8-10,<br>N=88) | Very high stress<br>(PSS ≥11,<br>N=16) | P<br>value |
|------------------------------------------------------------|-------------------------------------|------------------------------------|----------------------------------------|------------|
|                                                            | Mean ± SD<br>or N (%)               | Mean ± SD<br>or N (%)              | Mean ± SD<br>or N (%)                  |            |
| Age (years)                                                | 7.9 ± 1.9                           | 7.8 ± 1.8                          | 8.2 ± 2.3                              | 0.70       |
| Gender (male)                                              | 134 (54)                            | 44 (50)                            | 8 (50)                                 | 0.77       |
| Caregiver gender<br>(female)                               | 239 (98)                            | 82 (96)                            | 16 (100)                               | 0.60       |
| <u>Race:</u>                                               |                                     |                                    |                                        |            |
| White                                                      | 13 (5)                              | 3 (3)                              | 0 (0)                                  | 0.24       |
| Black                                                      | 89 (36)                             | 29 (33)                            | 4 (25)                                 |            |
| Hispanic                                                   | 91 (37)                             | 35 (40)                            | 4 (25)                                 |            |
| Mixed                                                      | 41 (17)                             | 12 (14)                            | 6 (38)                                 |            |
| Other                                                      | 13 (5)                              | 9 (10)                             | 2 (12)                                 |            |
| <u>Household income:</u>                                   |                                     |                                    |                                        |            |
| < \$25,000                                                 | 96 (39)                             | 36 (41)                            | 13 (81)                                | 0.008      |
| ≥ \$25,000                                                 | 111 (45)                            | 33 (38)                            | 1 (6)                                  |            |
| Missing                                                    | 40 (16)                             | 19 (22)                            | 2 (12)                                 |            |
| Caregiver education<br>(graduated high school)             | 202 (82)                            | 69 (78)                            | 13 (81)                                | 0.79       |
| Employment (≥ 1<br>employed adult in home)                 | 189 (78)                            | 57 (67)                            | 9 (56)                                 | 0.03       |
| Caregiver marital status<br>(married)                      | 80 (32)                             | 22 (25)                            | 3 (19)                                 | 0.26       |
| Child overweight/obese<br>(BMI percentile)                 | 74.6 ± 27.2                         | 72.9 ± 27.6                        | 88.8 ± 15.2                            | 0.09       |
| Family history of asthma                                   | 195 (79)                            | 73 (83)                            | 15 (94)                                | 0.28       |
| Dampness in the home                                       | 89 (36)                             | 29 (33)                            | 10 (62)                                | 0.08       |
| ≥1 smoker in home                                          | 78 (32)                             | 29 (33)                            | 9 (56)                                 | 0.13       |
| Inhaled corticosteroid use                                 | 125 (51)                            | 51 (58)                            | 7 (44)                                 | 0.39       |
| Medication adherence                                       | 176 (80)                            | 60 (78)                            | 11 (85)                                | 0.82       |
| >10 Hours television<br>/week (weekdays)*                  | 59 (32)                             | 24 (35)                            | 7 (47)                                 | 0.48       |
| Child anxiety<br>(RCMAS score)**                           | 15.9 ± 5.6                          | 14.9 ± 5.2                         | 15                                     | 0.92       |
| Good condition of<br>houses and streets in<br>Neighborhood | 122 (66)                            | 40 (59)                            | 7 (47)                                 | 0.23       |
| Household mouse<br>allergen, µg/g                          | 2.2 ± 8.6                           | 1.0 ± 2.7                          | 0.7 ± 1.5                              | 0.39       |
| Any household<br>cockroach allergen                        | 7 (3)                               | 2 (3)                              | 1 (7)                                  | 0.66       |

Classroom characteristics:

|                                               |         |         |        |      |
|-----------------------------------------------|---------|---------|--------|------|
| Moisture/mildew                               | 67 (37) | 36 (51) | 5 (42) | 0.10 |
| Condition of walls, ceiling, floors, windows: |         |         |        |      |
| Intact                                        | 89 (49) | 34 (49) | 4 (33) | 0.27 |
| Fair                                          | 72 (39) | 33 (47) | 7 (58) |      |
| Poor                                          | 22 (12) | 3 (4)   | 1 (8)  |      |

Classroom mouse allergen (air), ng/m<sup>3</sup> (IQR):

|        |                     |                     |                     |      |
|--------|---------------------|---------------------|---------------------|------|
| Fall   | 1.31 (0.58,2.83)    | 1.51<br>(0.40,3.42) | 1.14<br>(0.70,3.30) | 0.98 |
| Spring | 2.90<br>(1.21,6.14) | 3.70<br>(1.50,6.57) | 3.21<br>(1.06,3.91) | 0.35 |

Classroom mouse allergen (dust), µg/g (IQR):

|                                         |                     |                     |                     |      |
|-----------------------------------------|---------------------|---------------------|---------------------|------|
| Fall                                    | 0.53<br>(0.15,2.26) | 0.47<br>(0.18,2.98) | 0.54<br>(0.29,2.28) | 0.80 |
| Spring                                  | 1.69<br>(0.40,5.76) | 1.86<br>(0.51,6.60) | 0.36<br>(0.17,6.98) | 0.47 |
| Any classroom cockroach allergen (air)  | 3 (1)               | 1 (1)               | 0 (0)               | 0.90 |
| Any classroom cockroach allergen (dust) | 2 (1)               | 1 (1)               | 0 (0)               | 0.90 |

\* > 10 hours per week chosen because American Academy of Pediatrics recommendations are for maximum of 2 hours per day.

\*\*only available in small subset (n=15 normal, n=7 high, n=1 very high)
